# Supplementary material for: A Novel SRP Recognition Sequence in the Homeostatic Control Region of Heat Shock Transcription Factor σ32
Source: PubMed Central journal article supplement (PMC4823717; doi:10.1038/srep24147), 2016-04-07
Supplement: srep24147-s1.pdf [file srep24147-s1.pdf]

## Supplementary Information

**A Novel SRP Recognition Sequence in the Homeostatic Control Region of Heat Shock**

**Transcription Factor  $\sigma^{32}$**

**Ryoji Miyazaki<sup>1</sup>, Takashi Yura<sup>2</sup>, Takehiro Suzuki<sup>3</sup>, Naoshi Dohmae<sup>3</sup>, Hiroyuki Mori<sup>1</sup>, and**

**Yoshinori Akiyama<sup>1†</sup>**

<sup>1</sup>Institute for Virus Research, Kyoto University, Kyoto 606-8507, Japan; <sup>2</sup>Faculty of Life Sciences, Kyoto Sangyo University, Kyoto 603-8555, Japan; <sup>3</sup>Center for Sustainable Resource Science, RIKEN, Saitama 351-0198, Japan

†Corresponding author: [yakiyama@virus.kyoto-u.ac.jp](mailto:yakiyama@virus.kyoto-u.ac.jp)

## Supplementary methods

### Plasmids

For construction of the pTTQ18-*his<sub>6</sub>-rpoH(amb)* and pTTQ18-*his<sub>10</sub>-rpoH(amb)* plasmids, an *amber* mutation was introduced into pRM5 (pTTQ18-*his<sub>6</sub>-rpoH*)<sup>1</sup> and pRM66, respectively, by site-directed mutagenesis. pRM66 (pTTQ18-*his<sub>10</sub>-rpoH*) was a derivative of pRM5<sup>1</sup> and was constructed by converting *his<sub>6</sub>-rpoH* to *his<sub>10</sub>-rpoH* by site-directed mutagenesis. pTTQ18-*his<sub>6</sub>-rpoH(amb)* derivatives additionally carrying the A50D, K51E, I54N or R91P mutation were constructed by site-directed mutagenesis using an appropriate pTTQ18-*his<sub>6</sub>-rpoH(amb)* plasmid as a template.

pRM26 (pUC118-*ffh*) was constructed as follows. An *ffh* DNA fragment was PCR-amplified from the genome of W3110 using a pair of primers, *ffh*-for and *ffh*-rev, digested with EcoRI and BamHI, and cloned into the same sites of pUC118. pRM45 (pTTQ18-*ffh*) was constructed by subcloning the EcoRI-BamHI *ffh* fragment of pRM26 into the same sites of pTTQ18. For construction of pRM52 (pTTQ18-*ffh+ffs*), an *ffs* DNA fragment was PCR-amplified from the genome of W3110 using a pair of primers, *ffs*-for and *ffs*-rev, digested with PstI and SphI, and cloned into the same sites of pRM45. pTTQ18-*ffh(amb)+ffs* plasmids were constructed by site-directed mutagenesis using pRM52 as a template. pRM83 was constructed by altering the EcoRI recognition sequence (GAATTC) located outside the multicloning site of pCL1920<sup>2</sup> to TTATTC by site-directed mutagenesis. For construction of pRM83-*ffh+ffs*, an *ffh+ffs* DNA fragment was PCR-amplified from pRM52 using a pair of primers, *srp*-for and *srp*-rev, digested with HindIII and EcoRI, and cloned into the same sites of pRM83. pRM151 (pTTQ18-*ffh(C406S)+ffs*), a plasmid encoding Cys-less Ffh, was constructed by site-directed mutagenesis using pRM52 (pTTQ18-*ffh+ffs*) as a template. The derivatives of pRM151 encoding a single Cys variant of Ffh were constructed by site-directed mutagenesis. For construction of the pSTD689-*ffh(Cys)+ffs* plasmids, the EcoRI-HindIII *ffh(Cys)+ffs*

fragments of the pRM151 derivatives encoding a single Cys Ffh were subcloned into the same sites of pSTD689<sup>3</sup>. pRM203 (pTTQ18-*his*<sub>10</sub>-*rpoH*(T52C)) was constructed by site-directed mutagenesis using pRM66 (pTTQ18-*his*<sub>10</sub>-*rpoH*) as a template. pRM153, a derivative of pEVOL-pAzF (Addgene)<sup>4</sup> having a *spc* marker instead of the *cat* marker, was constructed by cloning a *spc* marker fragment that had been PCR-amplified from pHP45Ω<sup>5</sup> using a pair of primers, omega-for and omega-rev, into pEVOL-pAzF using In-Fusion HD Cloning Kit (Takara Bio).

### **Media and Bacterial Cultures**

Cells were grown in L medium (10 g/liter bacto-tryptone, 5 g/liter bacto-yeast extract, 5 g/liter NaCl; pH adjusted to 7.2) or M9 medium (without CaCl<sub>2</sub>)<sup>6</sup>. 50 µg/ml ampicillin, 20 µg/ml chloramphenicol and 50 µg/ml spectinomycin were added as appropriate for growing plasmid-bearing cells. Bacterial growth was monitored by Mini photo 518R (660 nm; TAITEC) or Klett-Summerson colorimeter (filter No. 54; Klett Manufacturing).

**Table S1. Strains used in this study.**

| Strains  | Genotype                                                                                                              | References |
|----------|-----------------------------------------------------------------------------------------------------------------------|------------|
| CAG48238 | MG1655 $\Delta lacX74$ $\lambda JW2(P_{hipG}-lacZ)$                                                                   | 9          |
| CAG48373 | CAG48238 $\Delta ftsH::kan$ $sfhC21$ $zad-220::Tn10$                                                                  | 9          |
| RM591    | CAG48238 $\Delta dnaKJ::kan$                                                                                          | This study |
| MC4100   | <i>araD139</i> $\Delta(argF-lac)U169$ <i>rpsL150</i> <i>relA1</i> <i>flbB5301</i>                                     | 10         |
| WAM121   | MC4100 <i>ara</i> <sup>+</sup> <i>ffh1::kan</i> <i>attB::R6Kori</i> $P_{araBAD}$ - <i>ffh</i> <sup>+</sup> <i>cat</i> | 11         |

**Table S2. Plasmids used in this study**

| Plasmids   | Vector | Encoded proteins or descriptions                                                                                                                 | References or sources      |
|------------|--------|--------------------------------------------------------------------------------------------------------------------------------------------------|----------------------------|
| pTTQ18     |        | Expression vector; P <sub>lac</sub> , Amp <sup>R</sup>                                                                                           | Amersham Pharmacia Biotech |
| pUC118     |        | Expression vector; P <sub>lac</sub> , Amp <sup>R</sup>                                                                                           | Takara shuzo               |
| pSTD689    |        | Expressopm vector; P <sub>lac</sub> , Spc <sup>R</sup>                                                                                           | 3                          |
| pCL1920    |        | Expression vector; P <sub>lac</sub> , Spc <sup>R</sup>                                                                                           | 2                          |
| pRM83      |        | pCL1920 ΔEcoRI outside of MCS                                                                                                                    | This study                 |
| pEVOL-pBpF |        | p15A-derivative encoding mutant <i>M. jannaschii</i> aminoacyl-tRNA synthetase for pBPA and the corresponding suppressor tRNA; Cm <sup>R</sup>   | 4                          |
| pEVOL-pAzF |        | p15A-derivative encoding mutant <i>M. jannaschii</i> aminoacyl-tRNA synthetase for pAzPA and the corresponding suppressor tRNA; Cm <sup>R</sup>  | 4                          |
| pRM153     |        | p15A-derivative encoding mutant <i>M. jannaschii</i> aminoacyl-tRNA synthetase for pAzPA and the corresponding suppressor tRNA; Spc <sup>R</sup> | This study                 |
| pCP20      |        | pSC101 derivative; Rep(Ts) <i>bla cat</i> λcI857 λP <sub>R</sub> <i>FLP</i> <sup>+</sup>                                                         | 12                         |
| pRM5       | pTTQ18 | His <sub>6</sub> -σ <sup>32</sup>                                                                                                                | 1                          |
| pRM8       | pTTQ18 | His <sub>6</sub> -σ <sup>32</sup> (R35 <i>amb</i> )                                                                                              | This study                 |
| pRM9       | pTTQ18 | His <sub>6</sub> -σ <sup>32</sup> (A38 <i>amb</i> )                                                                                              | This study                 |
| pRM10      | pTTQ18 | His <sub>6</sub> -σ <sup>32</sup> (L41 <i>amb</i> )                                                                                              | This study                 |
| pRM11      | pTTQ18 | His <sub>6</sub> -σ <sup>32</sup> (H44 <i>amb</i> )                                                                                              | This study                 |
| pRM12      | pTTQ18 | His <sub>6</sub> -σ <sup>32</sup> (L47 <i>amb</i> )                                                                                              | This study                 |
| pRM13      | pTTQ18 | His <sub>6</sub> -σ <sup>32</sup> (E48 <i>amb</i> )                                                                                              | This study                 |
| pRM14      | pTTQ18 | His <sub>6</sub> -σ <sup>32</sup> (A49 <i>amb</i> )                                                                                              | This study                 |
| pRM15      | pTTQ18 | His <sub>6</sub> -σ <sup>32</sup> (A50 <i>amb</i> )                                                                                              | This study                 |
| pRM16      | pTTQ18 | His <sub>6</sub> -σ <sup>32</sup> (K51 <i>amb</i> )                                                                                              | This study                 |
| pRM17      | pTTQ18 | His <sub>6</sub> -σ <sup>32</sup> (T52 <i>amb</i> )                                                                                              | 1                          |
| pRM18      | pTTQ18 | His <sub>6</sub> -σ <sup>32</sup> (L53 <i>amb</i> )                                                                                              | This study                 |
| pRM19      | pTTQ18 | His <sub>6</sub> -σ <sup>32</sup> (I54 <i>amb</i> )                                                                                              | This study                 |
| pRM20      | pTTQ18 | His <sub>6</sub> -σ <sup>32</sup> (L55 <i>amb</i> )                                                                                              | This study                 |
| pRM21      | pTTQ18 | His <sub>6</sub> -σ <sup>32</sup> (L58 <i>amb</i> )                                                                                              | This study                 |
| pRM22      | pTTQ18 | His <sub>6</sub> -σ <sup>32</sup> (V61 <i>amb</i> )                                                                                              | This study                 |
| pRM23      | pTTQ18 | His <sub>6</sub> -σ <sup>32</sup> (I64 <i>amb</i> )                                                                                              | This study                 |
| pRM24      | pTTQ18 | His <sub>6</sub> -σ <sup>32</sup> (N67 <i>amb</i> )                                                                                              | This study                 |
| pRM26      | pUC118 | Ffh                                                                                                                                              | This study                 |
| pRM28      | pTTQ18 | His <sub>6</sub> -σ <sup>32</sup> (A50D)                                                                                                         | This study                 |
| pRM30      | pTTQ18 | His <sub>6</sub> -σ <sup>32</sup> (K51E)                                                                                                         | This study                 |
| pRM32      | pTTQ18 | His <sub>6</sub> -σ <sup>32</sup> (I54N)                                                                                                         | This study                 |
| pRM34      | pTTQ18 | His <sub>6</sub> -σ <sup>32</sup> (A50D, K51 <i>amb</i> )                                                                                        | This study                 |

**Table S2. Plasmids used in this study**

|        |         |                                                           |            |
|--------|---------|-----------------------------------------------------------|------------|
| pRM35  | pTTQ18  | His <sub>6</sub> -σ <sup>32</sup> (A50D, T52 <i>amb</i> ) | This study |
| pRM37  | pTTQ18  | His <sub>6</sub> -σ <sup>32</sup> (K51E, T52 <i>amb</i> ) | This study |
| pRM39  | pTTQ18  | His <sub>6</sub> -σ <sup>32</sup> (I54N, K51 <i>amb</i> ) | This study |
| pRM40  | pTTQ18  | His <sub>6</sub> -σ <sup>32</sup> (I54N, T52 <i>amb</i> ) | This study |
| pRM45  | pTTQ18  | Ffh                                                       | This study |
| pRM51  | pTTQ18  | 4.5S RNA                                                  | This study |
| pRM52  | pTTQ18  | Ffh and 4.5S RNA                                          | This study |
| pRM66  | pTTQ18  | His <sub>10</sub> -σ <sup>32</sup>                        | This study |
| pRM67  | pTTQ18  | His <sub>10</sub> -σ <sup>32</sup> (K51 <i>amb</i> )      | This study |
| pRM70  | pTTQ18  | His <sub>10</sub> -σ <sup>32</sup> (L47 <i>amb</i> )      | This study |
| pRM88  | pRM83   | Ffh and 4.5S RNA                                          | This study |
| pRM133 | pTTQ18  | Ffh(M426 <i>amb</i> ) and 4.5S RNA                        | This study |
| pRM135 | pTTQ18  | Ffh(Q419 <i>amb</i> ) and 4.5S RNA                        | This study |
| pRM136 | pTTQ18  | Ffh(M423 <i>amb</i> ) and 4.5S RNA                        | This study |
| pRM139 | pTTQ18  | Ffh(L319 <i>amb</i> ) and 4.5S RNA                        | This study |
| pRM140 | pTTQ18  | Ffh(K322 <i>amb</i> ) and 4.5S RNA                        | This study |
| pRM141 | pTTQ18  | Ffh(L323 <i>amb</i> ) and 4.5S RNA                        | This study |
| pRM142 | pTTQ18  | Ffh(F334 <i>amb</i> ) and 4.5S RNA                        | This study |
| pRM143 | pTTQ18  | Ffh(L338 <i>amb</i> ) and 4.5S RNA                        | This study |
| pRM144 | pTTQ18  | Ffh(M341 <i>amb</i> ) and 4.5S RNA                        | This study |
| pRM145 | pTTQ18  | Ffh(M344 <i>amb</i> ) and 4.5S RNA                        | This study |
| pRM146 | pTTQ18  | Ffh(M376 <i>amb</i> ) and 4.5S RNA                        | This study |
| pRM147 | pTTQ18  | Ffh(L416 <i>amb</i> ) and 4.5S RNA                        | This study |
| pRM148 | pTTQ18  | Ffh(M427 <i>amb</i> ) and 4.5S RNA                        | This study |
| pRM151 | pTTQ18  | Ffh(C406S) and 4.5S RNA                                   | This study |
| pRM164 | pTTQ18  | Ffh(C406S, M341C) and 4.5S RNA                            | This study |
| pRM165 | pTTQ18  | Ffh(C406S, M376C) and 4.5S RNA                            | This study |
| pRM166 | pTTQ18  | Ffh(C406S, M426C) and 4.5S RNA                            | This study |
| pRM192 | pSTD689 | Ffh(C406S) and 4.5S RNA                                   | This study |
| pRM193 | pSTD689 | Ffh(C406S, M341C) and 4.5S RNA                            | This study |
| pRM194 | pSTD689 | Ffh(C406S, M376C) and 4.5S RNA                            | This study |
| pRM195 | pSTD689 | Ffh(C406S, M426C) and 4.5S RNA                            | This study |
| pRM203 | pTTQ18  | His <sub>10</sub> -σ <sup>32</sup> (T52C)                 | This study |
| pRM211 | pSTD689 | Ffh and 4.5S RNA                                          | This study |

---

**Table S3. Primers used in this study**

| Name      | Sequence (5'-3')                  |
|-----------|-----------------------------------|
| ffh-for   | GGGGAATTCGCCAACCGTTTCCACCCCAG     |
| ffh-rev   | CCCGGATCCTTAGCGACCAGGGAAGC        |
| ffs-for   | GGGCTGCAGTTTTTCCATCTTTTCTTCC      |
| ffs-rev   | CCCGCATGCCACGCCGCACAGCCCGTCACG    |
| srp-for   | GGCCAAGCTTGCCAACCGTTTCCACCCCAG    |
| srp-rev   | GGCCGAATTCCACGCCGCACAGCCCGTCAC    |
| omega-for | GCCACTCATCGCAGTAAAGTGCCACCTGACGTC |
| omega-rev | TGCTCATCCGGAATTGAGCTGCATGTGTCAGAG |

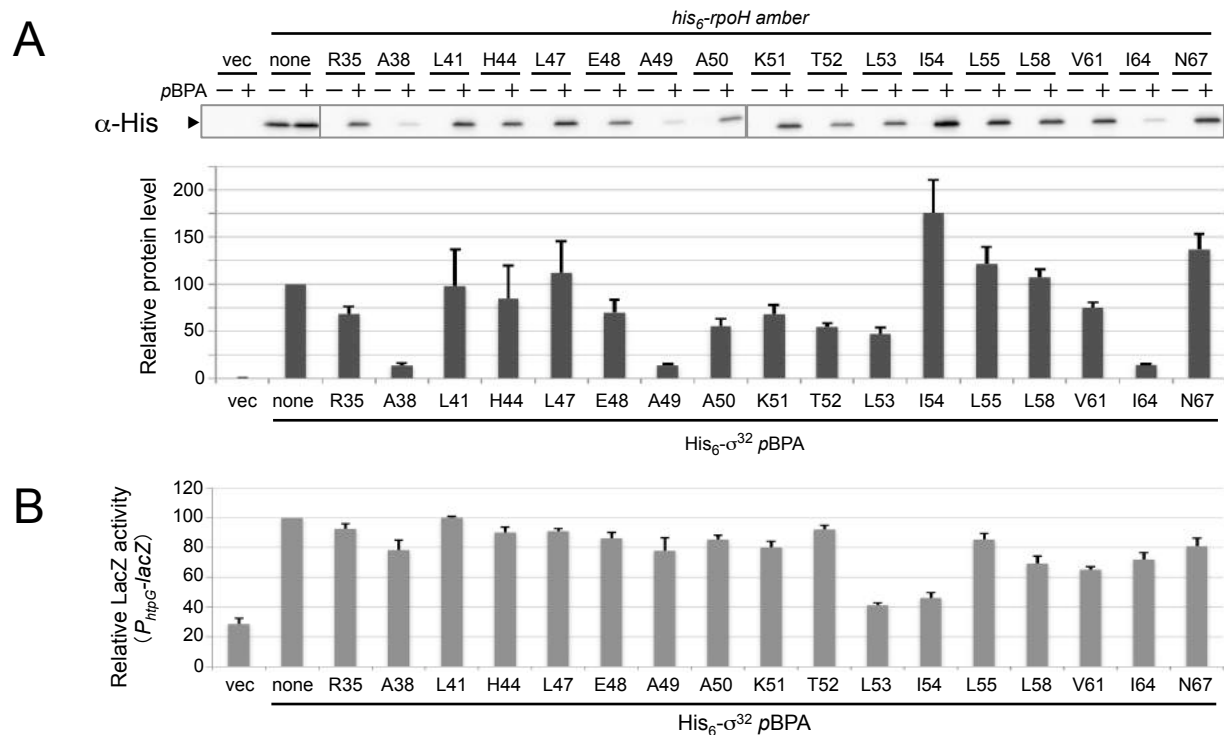

**Figure S1. Expression and activities of the His<sub>6</sub>- $\sigma^{32}$ pBPA variant proteins.** (A), His<sub>6</sub>- $\sigma^{32}$ pBPA protein levels. Cells of the strains used in Fig. 2B were grown at 30 °C in L-0.02% arabinose medium supplemented with or without 1 mM *pBPA*, and induced with 1 mM IPTG to express His<sub>6</sub>- $\sigma^{32}$ pBPA for 1 h. Total cellular proteins were analyzed by 10% SDS-PAGE and immunoblotting with anti-His-tag antibodies (*upper panel*). Three independent experiments were performed and mean values of relative band intensities (His<sub>6</sub>- $\sigma^{32}$  without *pBPA* was set to 100) are shown along with standard deviations (*lower panel*). (B),  $\sigma^{32}$  activity of the His<sub>6</sub>- $\sigma^{32}$ pBPA proteins. Portion of cells grown with *pBPA* in A was taken, and assayed for LacZ activity by the standard procedure<sup>6</sup>. Three independent experiments were performed, and mean values (that for WT was set to 100) are shown along with standard deviations.



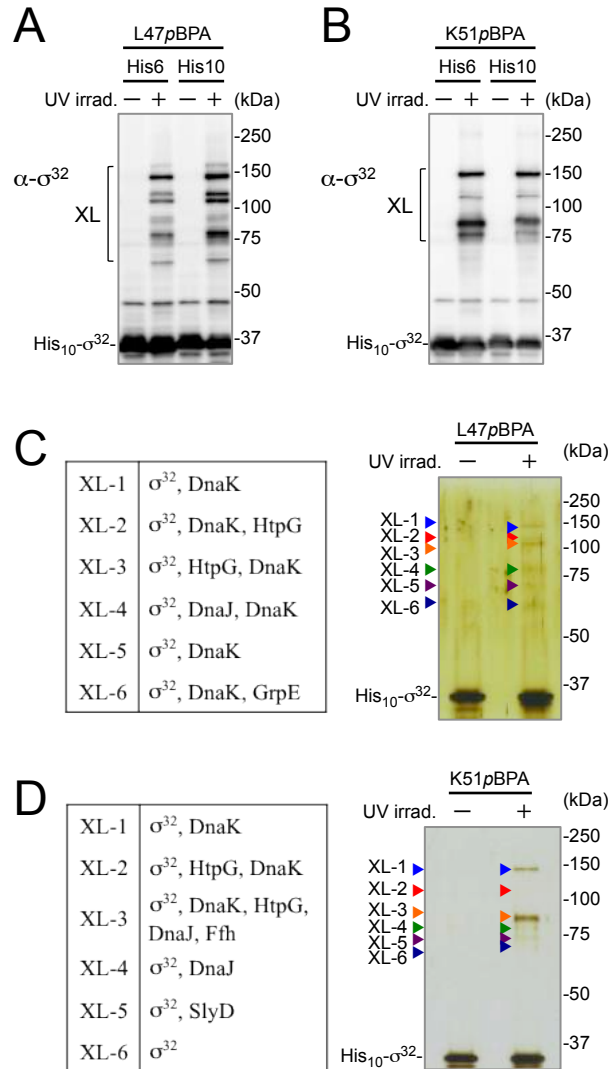

**Figure S2. Mass spectrometry (MS) analysis of the  $\sigma^{32}$ pBPA cross-linked products.** (A), (B), Cross-linking of the  $\sigma^{32}$ L47pBPA (A) and  $\sigma^{32}$ K51pBPA (B) variant proteins carrying His<sub>6</sub>- or His<sub>10</sub>-tag. Cells of CAG48238/pEVOL-pBpF/pTTQ18-*his*<sub>10</sub>-*rpoH* (*L47amb* or *K51amb*) were grown at 30°C, induced, and UV-irradiated as in Fig. 2. Total cellular proteins were analyzed by 7.5% SDS-PAGE and immunoblotting with anti- $\sigma^{32}$  antibodies. (C), (D), Identification of His<sub>10</sub>- $\sigma^{32}$ pBPA cross-linking partners by MS analysis. Cross-linked products obtained above with  $\sigma^{32}$ L47pBPA and  $\sigma^{32}$ K51pBPA (XL-1 to 6, right panel) were affinity purified as described in Methods, separated by 7.5% SDS-PAGE, and subjected to MS analysis. Proteins identified for each XL band are listed on the left. SlyD, rich in His residues, was accidentally purified, independent of His<sub>10</sub>- $\sigma^{32}$ .

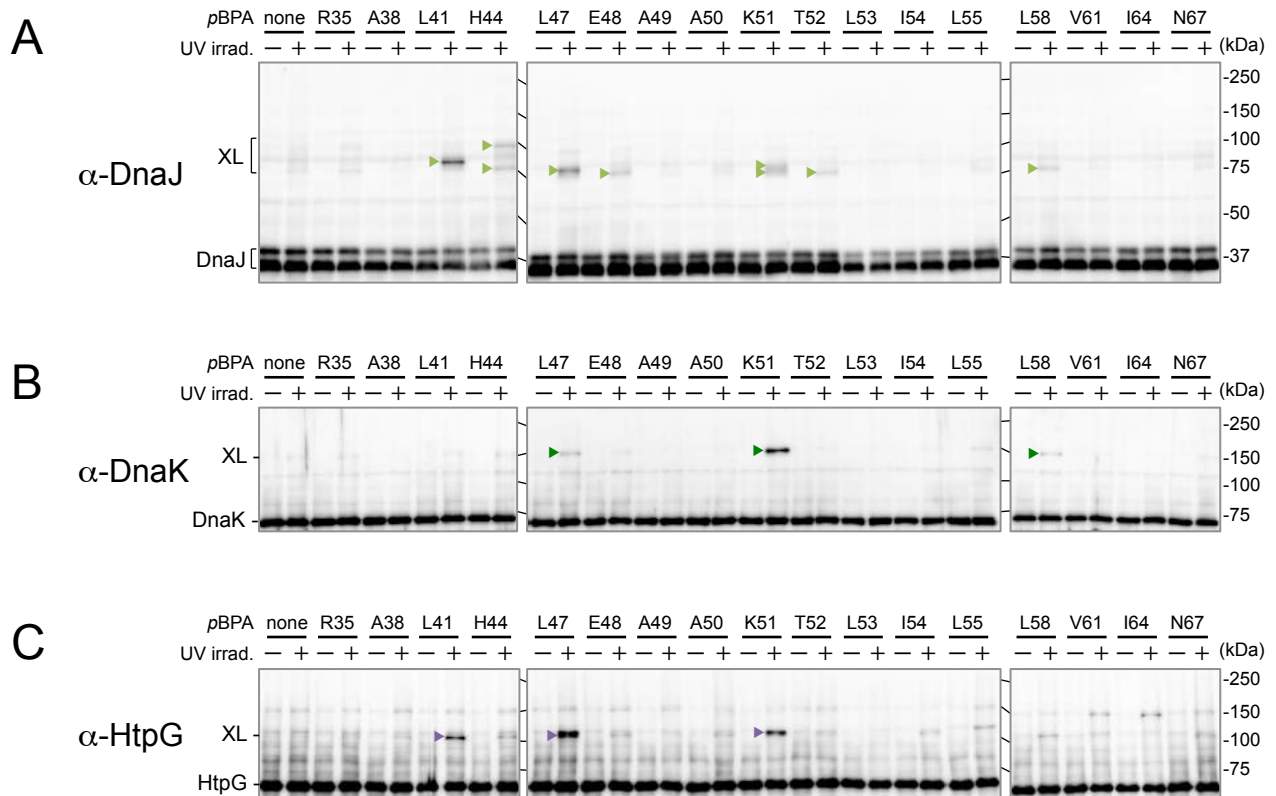

**Figure S3. DnaK, DnaJ and HtpG chaperones interacting with the homeostatic control region of  $\sigma^{32}$  were identified by immunoblotting with individual chaperone antibodies. (A), (B), (C),** Portions of the samples used in Fig. 2B and C were analyzed by 7.5% SDS-PAGE and immunoblotting with anti-DnaJ (A), anti-DnaK (B) or anti-HtpG antibodies (C). In some positions where these proteins were detected by MS analysis (see Fig. S2), anti-DnaK or anti-HtpG immunoblotting failed to detect the respective protein, probably due to low sensitivities of immunoblotting analysis. Arrow heads indicate cross-linked products.

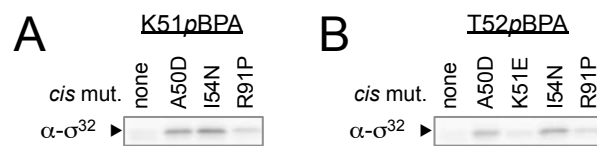

**Figure S4.  $\sigma^{32}$  dysregulation mutations enhance protein levels of  $\sigma^{32}$ pBPA.** (A), (B), Portion of cellular proteins used in Fig. 3 were analyzed by 10% SDS-PAGE followed by anti- $\sigma^{32}$  immunoblotting. Typical results using His<sub>6</sub>- $\sigma^{32}$ K51pBPA (A) and His<sub>6</sub>- $\sigma^{32}$ T52pBPA (B) with or without a dysregulation mutation are shown.

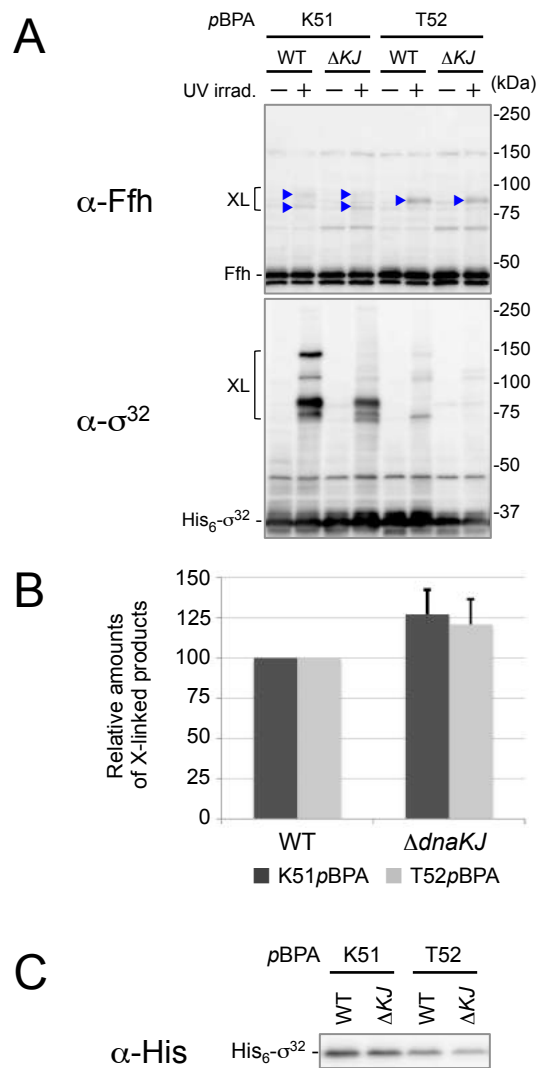

**Figure S5. DnaK/DnaJ chaperons are not essential for the  $\sigma^{32}$ -Ffh interaction.** (A), Cross-linking of  $\sigma^{32}$ pBPA in WT and  $\Delta dnaKJ$  strains. Cells of CAG48238 (WT) or RM591 ( $\Delta dnaKJ$ ), each carrying pEVOL-pBpF and pTTQ18-*his<sub>6</sub>-rpoH(amb)*, were grown and analyzed essentially as described in the legend to Fig. 2B and C. (B), Quantification of His<sub>6</sub>- $\sigma^{32}$ -Ffh cross-linked products. Relative amounts of the cross-linked products detected with anti- $\sigma^{32}$  antibody in A to the amounts of the unirradiated His<sub>6</sub>- $\sigma^{32}$  proteins detected with anti-His antibody in C were calculated as described in the legend to Fig. 3 (the value for WT was set to 100). Two independent experiments were performed, and mean values are shown along with standard deviations. (C), Accumulation of His<sub>6</sub>- $\sigma^{32}$  in the  $\Delta dnaKJ$  strain. Portion of cellular proteins in the UV-unirradiated samples used in A were analyzed by 10% SDS-PAGE followed by anti-His immunoblotting.



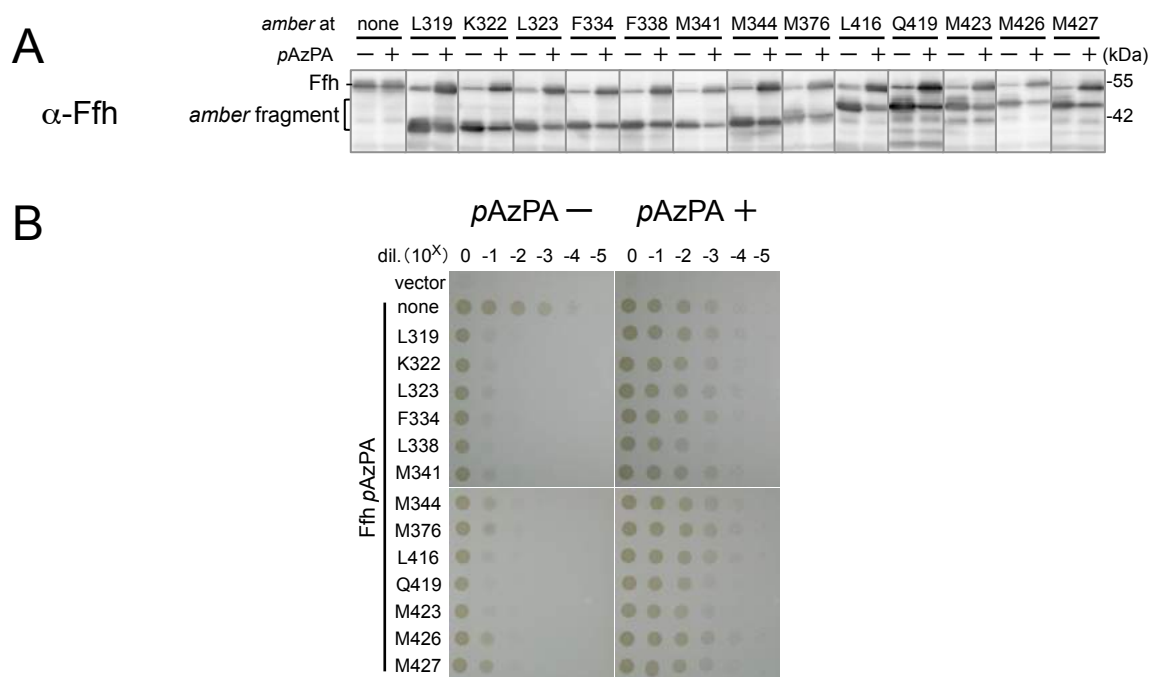

**Figure S7. Expression and activities of Ffh $p$ AzPA proteins containing  $p$ AzPA at or around the SP-binding site.** (A), Protein levels of the Ffh $p$ AzPA variants constructed. Samples used in Fig. 5D were analyzed by 10% SDS-PAGE and anti-Ffh immunoblotting. (B), Complementation assay for activities of Ffh $p$ AzPA proteins. Cells of WAM121 ( $\Delta$ *ffh1::kan P<sub>ara</sub>-ffh*)/pRM153/pTTQ18-*ffh(amb)*+*ffs* were grown at 30 °C in L-medium supplemented with 0.02% arabinose for 3 h, washed and suspended in saline (about 10<sup>9</sup> cells/ml), and serially diluted. Two microliter each of up to 10<sup>5</sup> dilutions was spotted onto L agar plates with or without 1 mM  $p$ AzPA, and incubated at 30 °C for 22 h to observe  $p$ AzPA-dependent growth of Ffh-depleted cells.

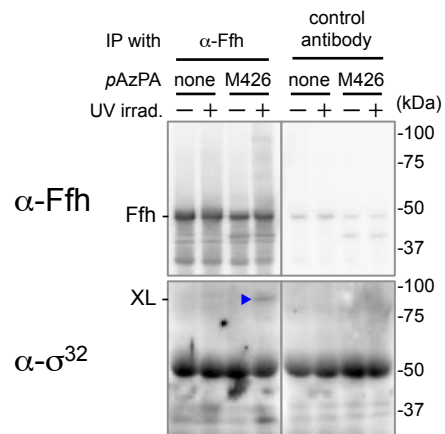

**Figure S8. Immunoprecipitation of Ffh-pAzPA cross-linked products with anti-Ffh and control antibodies.** Total cellular protein samples used in Fig. 5E were immunoprecipitated with anti-Ffh or control antibodies, solubilized in SDS sample buffer, and analyzed by 7.5% SDS-PAGE and immunoblotting with anti- $\sigma^{32}$  and anti-Ffh antibodies.

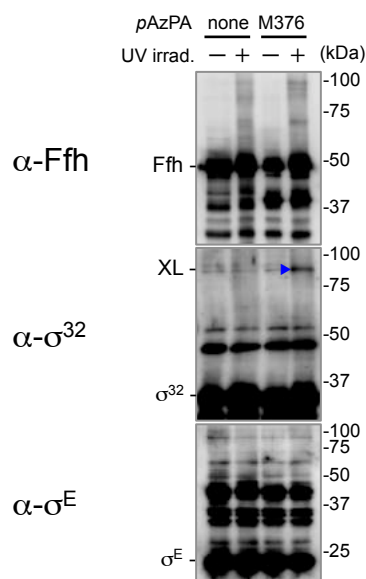

**Figure S9. Analysis of cross-linking of FfhAzPA with  $\sigma^E$ .** Immunoblotting analysis of *in vivo* photo cross-linking using FfhAzPA variant proteins. Cells of CAG48373 ( $\Delta$ *ftsH sfhC21*)/pEVOL-pAzF/pTTQ18-*ffh*(*WT* or *M376amb*)+*ffs* were grown at 30°C in L-medium supplemented with 0.02% arabinose and 1 mM pAzPA, induced to express FfhAzPA with 1 mM IPTG for 1 h, and UV-irradiated as indicated. Total cellular proteins were analyzed by 7.5% or 12.5% SDS-PAGE and immunoblotted with anti-Ffh and anti- $\sigma^E$  antibodies.



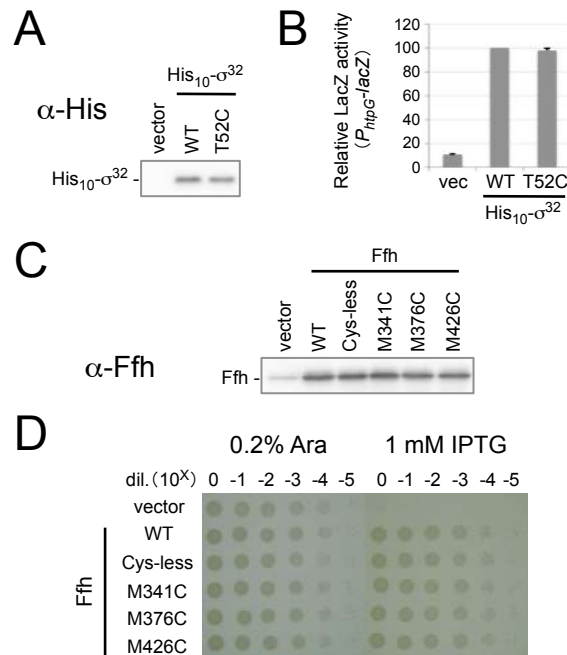

**Figure S10. Expression and activities of the single Cys variants of His<sub>10</sub>- $\sigma^{32}$  and Ffh.** (A), Protein levels of the His<sub>10</sub>- $\sigma^{32}$  Cys variant. Cells of CAG48238/pTTQ18-*his<sub>10</sub>-rpoH(Cys)* were grown at 30°C in L-medium, and induced with 1 mM IPTG to express His<sub>10</sub>- $\sigma^{32}$  Cys for 1 h. Total cellular proteins were analyzed by 10% SDS-PAGE and immunoblotting with anti-His-tag antibodies. (B),  $\sigma^{32}$  activity of the single Cys derivatives of His<sub>10</sub>- $\sigma^{32}$ . Portion of cells in A was taken, and assayed for LacZ activity by the standard procedure<sup>6</sup>. Two independent experiments were performed, and mean values (that for WT was set to 100) are shown along with standard deviations. (C), Protein levels of the Ffh Cys variants. Cells of CAG48238/pSTD689-*ffh(Cys)+ffs* were grown at 30°C in L-medium supplemented with 1 mM IPTG for 2.5 h. Total cellular proteins were analyzed by 10% SDS-PAGE and anti-Ffh immunoblotting. (D), Complementation assay for activity of Ffh Cys proteins. Cells of WAM121 ( $\Delta$ *ffh1::kan P<sub>ara</sub>-ffh*)/pSTD689-*ffh(Cys)+ffs* were grown at 30°C in L-medium supplemented with 0.2% arabinose for 3 h. Cells were washed, suspended in saline (about 10<sup>9</sup> cells/ml), and serially diluted. Two microliter each of up to 10<sup>5</sup> dilutions was spotted onto L agar plates supplemented with 0.2% arabinose or 1 mM IPTG, and incubated at 30°C for 18 h.



## SI References

- 1 Lim, B. *et al.* Heat shock transcription factor  $\sigma^{32}$  co-opts the signal recognition particle to regulate protein homeostasis in *E. coli*. *PLoS Biol.* **11**, e1001735 (2013).
- 2 Lerner, C. G. & Inouye, M. Low copy number plasmids for regulated low-level expression of cloned genes in *Escherichia coli* with blue/white insert screening capability. *Nucleic Acids Res.* **18**, 4631 (1990).
- 3 Kanehara, K., Ito, K. & Akiyama, Y. YaeL proteolysis of RseA is controlled by the PDZ domain of YaeL and a Gln-rich region of RseA. *EMBO J.* **22**, 6389-98 (2003).
- 4 Young, T. S., Ahmad, I., Yin, J. A. & Schultz, P. G. An enhanced system for unnatural amino acid mutagenesis in *E. coli*. *J Mol Biol* **395**, 361-74 (2010).
- 5 Blondelet-Rouault, M. H., Weiser, J., Lebrihi, A., Branny, P. & Pernodet, J. L. Antibiotic resistance gene cassettes derived from the  $\Omega$  interposon for use in *E. coli* and *Streptomyces*. *Gene* **190**, 315-7 (1997).
- 6 Miller, J. H. *Experiments in Molecular Genetics* (Cold Spring Harbor Lab Press, Cold Spring Harbor, NY) (1972).
- 7 Rosendal, K. R., Wild, K., Montoya, G. & Sinning, I. Crystal structure of the complete core of archaeal signal recognition particle and implications for interdomain communication. *Proc. Natl. Acad. Sci. USA* **100**, 14701-6 (2003).
- 8 Eisenberg, D., Weiss, R. M. & Terwilliger, T. C. The hydrophobic moment detects periodicity in protein hydrophobicity. *Proc. Natl. Acad. Sci. USA* **81**, 140-4 (1984).
- 9 Yura, T. *et al.* Analysis of  $\sigma^{32}$  mutants defective in chaperone-mediated feedback control reveals unexpected complexity of the heat shock response. *Proc. Natl. Acad. Sci. USA* **104**, 17638-43 (2007).
- 10 Silhavy, T. J., Berman, M. L. & Enquist, L. W. *Experiments with Gene Fusions* (Cold Spring Harbor Lab Press, Cold Spring Harbor, NY). (1984).
- 11 de Gier, J. W. *et al.* Assembly of a cytoplasmic membrane protein in *Escherichia coli* is dependent on the signal recognition particle. *FEBS Lett.* **399**, 307-9 (1996).
- 12 Cherepanov, P. P. & Wackernagel, W. Gene disruption in *Escherichia coli*: Tc<sup>R</sup> and Km<sup>R</sup> cassettes with the option of Flp-catalyzed excision of the antibiotic-resistance determinant. *Gene* **158**, 9-14 (1995).
